# Supplementary material for: Seawater electrolysis for hydrogen production: a solution looking for a problem?
Source: Royal Society of Chemistry journal article supplement (doi:10.1039/d1ee00870f), 2021-01-01
Supplement: d1ee00870f1.pdf [file d1ee00870f1.pdf]

## Perspective: Supplementary Information

### Seawater Electrolysis for Hydrogen Production: A Solution Looking for a Problem?

M.A. Khan,<sup>1</sup> Tareq Al-Attas,<sup>1</sup> Soumyabrata Roy,<sup>2</sup> M.M. Rahman,<sup>2</sup> Noredine Ghaffour,<sup>3</sup> Venkataraman Thangadurai,<sup>4</sup> Stephen Larter,<sup>5</sup> Jinguang Hu,<sup>1\*</sup> Pulickel M. Ajayan,<sup>2\*</sup> Md Golam Kibria<sup>1\*</sup>

Table S1. Input parameters for PEM electrolyzer system based on production capacity of 50 tons H<sub>2</sub>/day (costs in 2016 \$). <sup>1</sup>

|                                                       |       |
|-------------------------------------------------------|-------|
| Stack cost (\$/kW)                                    | 342   |
| Mechanical BoP (\$/kW)                                | 36    |
| Electrical BoP (\$/kW)                                | 82    |
| Total cost (\$/kW)                                    | 460   |
| O&M (%)                                               | 3%    |
| Stack electrical usage (kWh/kg)                       | 50.4  |
| BOP electrical usage (kWh/kg)                         | 5.04  |
| Total energy of PEM H <sub>2</sub> plant (kWh/kg)     | 55.44 |
| Stack replacement cost (% of installed capital costs) | 15%   |
| Outlet H <sub>2</sub> pressure (bar)                  | 20    |
| Stack replacement interval (years)                    | 7     |
| Installation cost (% of uninstalled capital)          | 12%   |
| Current Density (A/cm <sup>2</sup> )                  | 2     |
| Cell Voltage (V)                                      | 1.9   |

1. Peterson, D.; Vickers, J.; DeSantis, D., Hydrogen production cost from PEM electrolysis—2019. *DOE Hydrogen Fuel Cells Program Record 19009* **2020**.
